# Supplementary material for: Human biomonitoring of serum polycyclic aromatic hydrocarbons and oxygenated derivatives by gas chromatography coupled with tandem mass spectrometry
Source: Royal Society of Chemistry journal article supplement (doi:10.1039/d4ay00758a), 2024-01-01
Supplement: d4ay00758a1.pdf [file d4ay00758a1.pdf]

## **Human Biomonitoring of Serum Polycyclic Aromatic Hydrocarbons and Oxygenated Derivatives by Gas Chromatography Coupled with Tandem Mass Spectrometry**

Rong Yang <sup>a</sup>, Chenwen Shi <sup>a,b</sup>, Xiaojing Li <sup>a</sup>, Pingsheng Gan <sup>a</sup>, Xinhong Pan <sup>a</sup>, Rongfei Peng <sup>a,\*</sup>, Lei Tan <sup>a,b\*</sup>

<sup>a</sup> Guangzhou Center for Disease Control and Prevention, Guangzhou 510440, China

<sup>b</sup> School of Public Health, Guangzhou Medical University, Guangzhou 510515, China

\*Corresponding author: Lei Tan, E-mail: [jsutanlei@gmail.com](mailto:jsutanlei@gmail.com); [gzprf@126.com](mailto:gzprf@126.com).

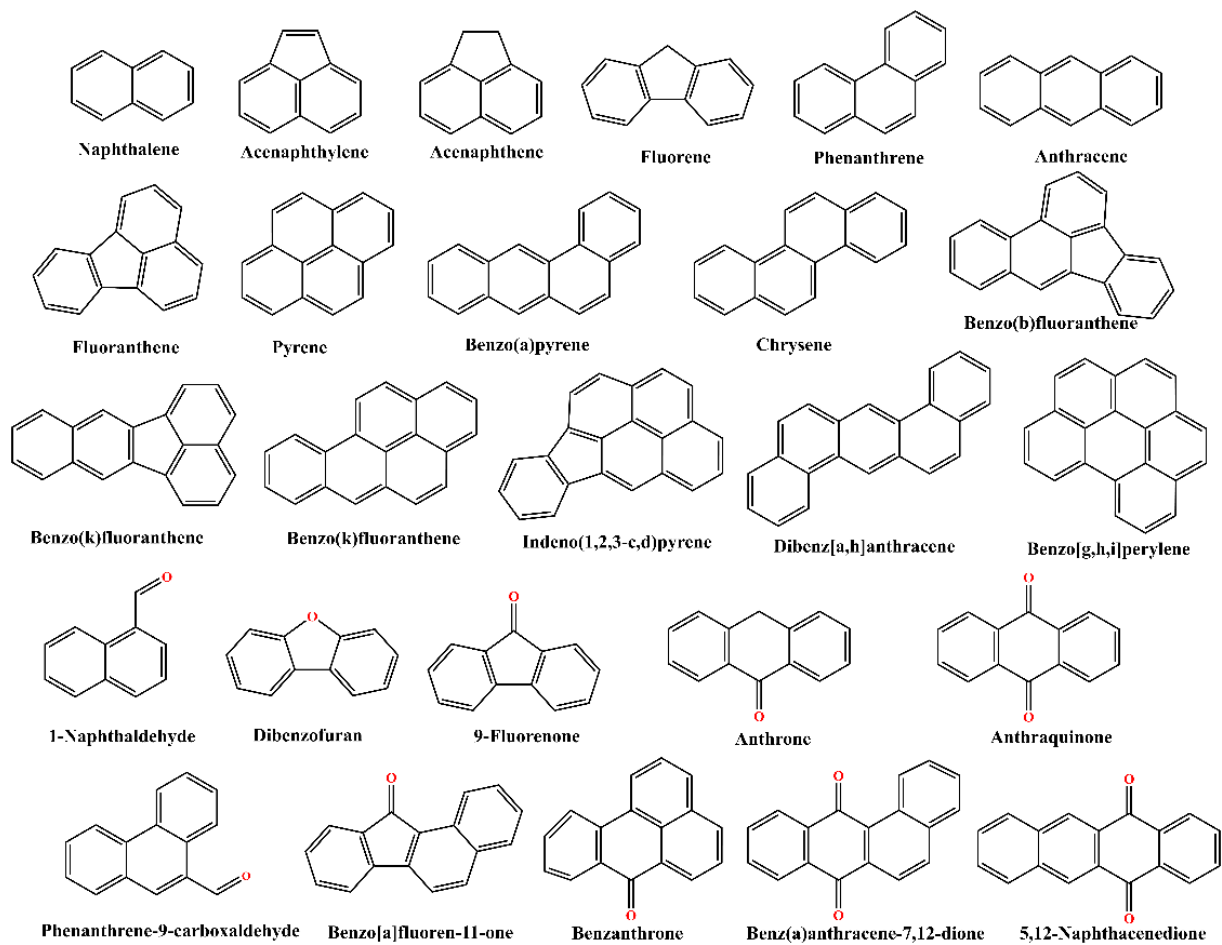

**Figure S1.** Chemical structures of the PAHs and OPAHs in the study.

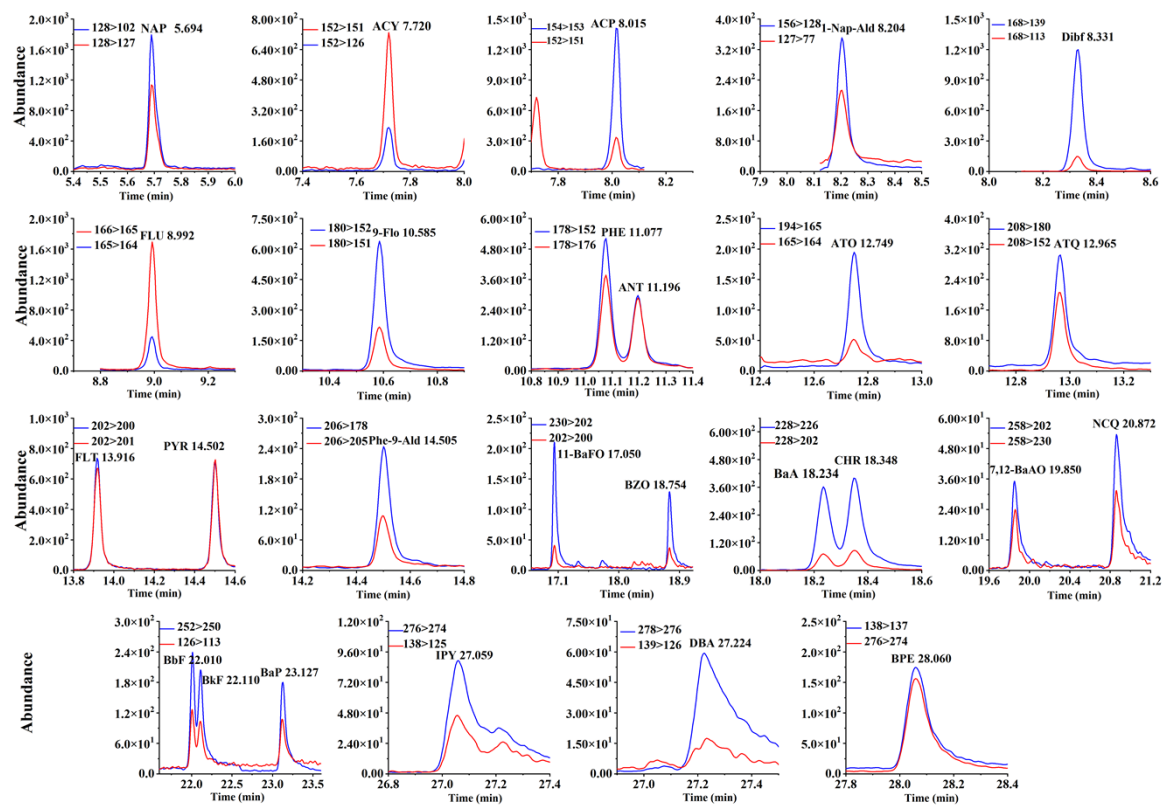

**Figure S2.** Multiple reaction monitoring of extracted chromatograms of the PAHs and OPAHs with an external standard concentration of 1.0  $\mu\text{g/L}$ .

**Table S1.** Chemical characteristics of PAHs and OPAHs and their optimized MS/MS parameters

| Compound                      | Abbreviation | CAS       | Molecular Formula | Molecular Weight | RT (min) | MRM Parameter    | Collision Energy (ev) | IARC)Carcinogen Classification Schemes |
|-------------------------------|--------------|-----------|-------------------|------------------|----------|------------------|-----------------------|----------------------------------------|
| <i>Analytes</i>               |              |           |                   |                  |          |                  |                       |                                        |
| Naphthalene                   | NAP          | 91-20-3   | C10H8             | 128.17           | 5.694    | 128>102, 128>127 | 20, 20                | 2B (Vol. 82) 2002                      |
| Acenaphthylene                | ACY          | 208-96-8  | C12H8             | 152.19           | 7.720    | 152>151, 152>126 | 25, 25                |                                        |
| Acenaphthene                  | ACP          | 83-32-9   | C12H10            | 154.21           | 8.015    | 154>153, 152>151 | 20, 25                | 3 (Vol. 92) 2010                       |
| 1-Naphthaldehyde              | 1-Nap-Ald    | 66-77-3   | C11H8O            | 156.18           | 8.204    | 156>128, 127>77  | 15, 20                |                                        |
| Dibenzofuran                  | Dibf         | 132-64-9  | C12H8O            | 168.19           | 8.331    | 168>139, 168>113 | 25, 45                |                                        |
| Fluorene                      | FLU          | 86-73-7   | C13H10            | 166.22           | 8.992    | 166>165, 165>164 | 20, 25                | 3 (Vol. Sup 7, 92) 2010                |
| 9-Fluorenone                  | 9-Flo        | 486-25-9  | C13H8O            | 180.2            | 10.585   | 180>152, 180>151 | 20, 30                |                                        |
| Phenanthrene                  | PHE          | 85-01-8   | C14H10            | 178.23           | 11.077   | 178>152, 178>176 | 25, 35                | 3 (Vol. Sup 7, 92) 2010                |
| Anthracene                    | ANT          | 120-12-7  | C14H10            | 178.23           | 11.196   | 178>152, 178>176 | 25, 35                | 3 (Vol. 92, Sup 7) 2010                |
| Anthrone                      | ATO          | 90-44-8   | C14H10O           | 194.23           | 12.749   | 194>165, 165>164 | 25, 25                |                                        |
| Anthraquinone                 | ATQ          | 84-65-1   | C14H8O2           | 208.21           | 12.965   | 208>180, 208>152 | 10, 25                |                                        |
| Fluoranthene                  | FLT          | 206-44-0  | C16H10            | 202.25           | 13.916   | 202>200, 202>201 | 40, 25                | 3 (Vol. Sup 7, 92) 2010                |
| Pyrene                        | PYR          | 129-00-0  | C16H10            | 202.25           | 14.502   | 202>200, 202>201 | 40, 25                | 3 (Vol. Sup 7, 92) 2010                |
| Phenanthrene-9-carboxaldehyde | Phe-9-Ald    | 4707-71-5 | C15H10O           | 206.24           | 14.505   | 206>178, 206>205 | 15, 15                |                                        |
| 11H-Benzo[a]fluoren-11-one    | 11-BaFO      | 479-79-8  | C17H10O           | 230.26           | 17.050   | 230>202, 230>200 | 20, 50                |                                        |
| Benzo(a)anthracene            | BaA          | 56-55-3   | C18H12            | 228.29           | 18.234   | 228>226, 228>202 | 35, 30                | 2B (Vol. 92, Sup 7) 2010               |
| Chrysene                      | CHR          | 218-01-9  | C18H12            | 228.29           | 18.348   | 228>226, 228>202 | 35, 30                | 2B (Vol. 92) 2010                      |
| Benzanthrone                  | BZO          | 82-05-3   | C17H10O           | 230.26           | 18.754   | 230>202, 202>200 | 25, 40                |                                        |
| Benz(a)anthracene-7,12-dione  | 7,12-BaAO    | 2498-66-0 | C18H10O2          | 258.27           | 19.850   | 258>202, 258>230 | 25, 20                |                                        |
| 5,12-Naphthacenedione         | NCQ          | 1090-13-7 | C18H10O2          | 258.27           | 20.872   | 258>202, 258>230 | 25, 20                |                                        |
| Benzo(b)fluoranthene          | BbF          | 205-99-2  | C20H12            | 252.31           | 22.010   | 252>250, 126>113 | 30, 10                | 2B (Vol. 92) 2010                      |

|                                  |          |             |         |        |        |                  |        |                               |
|----------------------------------|----------|-------------|---------|--------|--------|------------------|--------|-------------------------------|
| Benzo(k)fluoranthene             | BkF      | 207-08-9    | C20H12  | 252.31 | 22.110 | 252>250, 126>113 | 30, 10 | 2B (Vol. 92) 2010             |
| Benzo(a)pyrene                   | BaP      | 50-32-8     | C20H12  | 252.31 | 23.127 | 252>250, 126>113 | 40, 10 | 1 (Vol. Sup 7, 92, 100F) 2012 |
| Indeno(1,2,3-c,d)pyrene          | IPY      | 193-39-5    | C22H12  | 276.33 | 27.059 | 276>274, 138>125 | 45, 15 | 2B (Vol. Sup 7, 92) 2010      |
| Dibenzo(a,h)anthracene           | DBA      | 53-70-3     | C22H14  | 278.35 | 27.224 | 278>276, 139>126 | 35, 10 | 2A (Vol. Sup 7, 92) 2010      |
| Benzo(g,h,i)perylene             | BPE      | 191-24-2    | C22H12  | 276.33 | 28.060 | 138>137, 276>274 | 15, 50 | 3 (Vol. 92, Sup 7) 2010       |
| <b><i>Internal Standards</i></b> |          |             |         |        |        |                  |        |                               |
| Naphthalene-D8                   | NAP-D8   | 1146-65-2   | C10D8   | 136.22 | 5.673  | 136>108, 136>84  | 25, 25 |                               |
| Acenaphthene-D10                 | ACP-D10  | 15067-26-2  | C12D10  | 164.27 | 7.958  | 164>162, 164>160 | 20, 35 |                               |
| 9-Fluorenone-D8                  | 9-Flo-D8 | 137219-34-2 | C13D8O  | 188.25 | 10.542 | 188>160, 188>158 | 20, 30 |                               |
| Phenanthrene-D10                 | PHE-D10  | 1517-22-2   | C14D10  | 188.29 | 11.022 | 188>160, 188>186 | 25, 25 |                               |
| Anthraquinone-D8                 | ATQ-D8   | 10439-39-1  | C14D8O2 | 216.26 | 12.909 | 216>188, 188>160 | 10, 15 |                               |
| Chrysene-D12                     | CHR-D12  | 1719-03-5   | C18D12  | 240.36 | 18.259 | 240>236, 240>212 | 40, 35 |                               |
| Perylene-D12                     | PER-D12  | 1520-96-3   | C20D12  | 264.38 | 23.319 | 264>260, 132>118 | 40, 20 |                               |

---

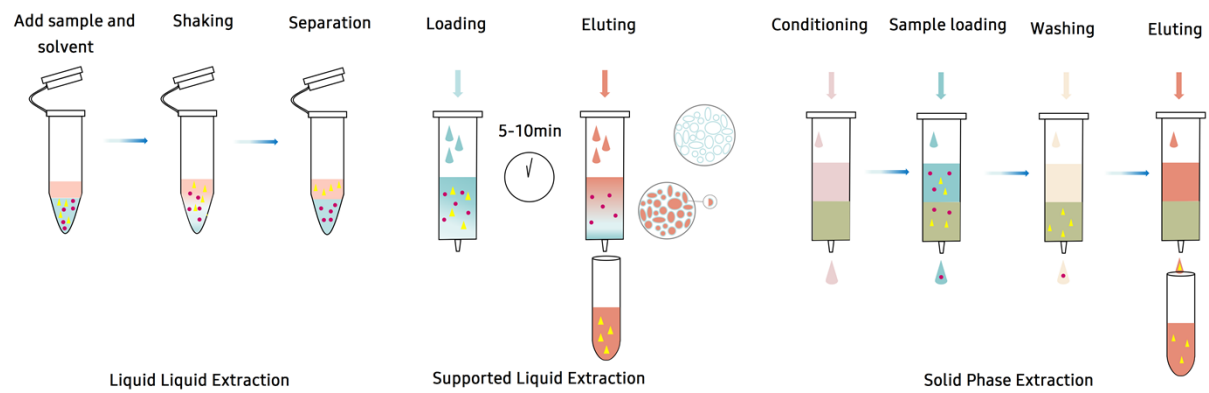

**Figure S3.** Schematic illustration of the experiment procedures for liquid-liquid extraction, supported liquid extraction and solid-phase extraction.

**Table S2.** Detailed calibration characteristics, quantification limits, and reproducibility data for the analysis of PAHs and OPAHs in serum samples.

| Compound     | r2    | Linear equation | Linear range<br>(ug/L) | LOD<br>(ug/L) | Inter-day (n=6) |            | Intra-day (n=6) |            | Matrix<br>effects<br>(%) | Internal<br>standard |
|--------------|-------|-----------------|------------------------|---------------|-----------------|------------|-----------------|------------|--------------------------|----------------------|
|              |       |                 |                        |               | Recovery<br>(%) | RSD<br>(%) | Recovery<br>(%) | RSD<br>(%) |                          |                      |
| <b>PAHS</b>  |       |                 |                        |               |                 |            |                 |            |                          |                      |
| NAP          | 0.998 | y=0.939x+0.187  | 0.10-5.0               | 0.02          | 115.3           | 8.9        | 107.8           | 5.6        | 99.4                     | NAP-D8               |
| ACY          | 0.999 | y=0.786x        | 0.10-5.0               | 0.02          | 102.0           | 7.4        | 106.4           | 6.2        | 99.5                     | ACP-D10              |
| ACP          | 0.999 | y=1.43x         | 0.10-5.0               | 0.02          | 102.6           | 6.1        | 110.8           | 4.4        | 93.7                     | ACP-D10              |
| FLU          | 0.997 | y=1.94x+0.0257  | 0.10-5.0               | 0.02          | 105.1           | 6.5        | 107.3           | 5.9        | 96.8                     | PHE-D10              |
| PHE          | 0.999 | y=0.693x+0.0413 | 0.10-5.0               | 0.02          | 110.9           | 6.8        | 99.5            | 4.6        | 94.8                     | PHE-D10              |
| ANT          | 0.997 | y=0.532x        | 0.10-5.0               | 0.05          | 102.4           | 7.6        | 104.3           | 5.4        | 92.6                     | PHE-D10              |
| FLT          | 0.997 | y=1.36x         | 0.10-5.0               | 0.02          | 107.5           | 6.2        | 100.2           | 8.3        | 102                      | PHE-D10              |
| PYR          | 0.997 | y=1.29x         | 0.10-5.0               | 0.02          | 103.2           | 8.8        | 102.3           | 4.5        | 101                      | PHE-D10              |
| BaA          | 0.999 | y=.0.887x       | 0.10-5.0               | 0.03          | 104.2           | 9.0        | 110.8           | 8.4        | 129                      | CHR-D12              |
| CHR          | 0.999 | y=1.35x         | 0.10-5.0               | 0.03          | 112.0           | 10.2       | 99.4            | 8.6        | 102                      | CHR-D12              |
| BbF          | 0.999 | y=0.915x        | 0.10-5.0               | 0.05          | 82.5            | 9.7        | 98.1            | 7.6        | 130                      | CHR-D12              |
| BkF          | 0.998 | y=1.03x         | 0.10-5.0               | 0.05          | 85.4            | 6.3        | 89.4            | 5.3        | 108                      | CHR-D12              |
| BaP          | 0.999 | y=0.859x        | 0.10-5.0               | 0.05          | 90.3            | 5.5        | 107.3           | 8.0        | 91.2                     | PER-D12              |
| IPY          | 0.998 | y=0.613x        | 0.10-5.0               | 0.05          | 93.7            | 8.6        | 103.2           | 7.4        | 92.8                     | PER-D12              |
| DBA          | 0.998 | y=0.645x        | 0.10-5.0               | 0.05          | 89.1            | 7.4        | 93.4            | 6.9        | 95.1                     | PER-D12              |
| BPE          | 0.999 | y=1.30x         | 0.10-5.0               | 0.05          | 85.4            | 7.1        | 109.6           | 7.6        | 104                      | PER-D12              |
| <b>OPAHs</b> |       |                 |                        |               |                 |            |                 |            |                          |                      |
| 1-Nap-Ald    | 0.996 | y=0.463x        | 0.10-5.0               | 0.02          | 101.2           | 10.6       | 92.6            | 7.6        | 98.0                     | 9-Flo-D8             |
| Dibf         | 0.997 | y=1.64x+0.0422  | 0.10-5.0               | 0.02          | 98.6            | 10.1       | 97.7            | 8.6        | 116                      | 9-Flo-D8             |

|           |       |                   |          |      |       |      |       |     |      |          |
|-----------|-------|-------------------|----------|------|-------|------|-------|-----|------|----------|
| 9-Flo     | 0.999 | $y=0.506x+0.0400$ | 0.10-5.0 | 0.02 | 104.5 | 11.2 | 108.9 | 8.8 | 90.2 | 9-Flo-D8 |
| ATO       | 0.997 | $y=0.680x$        | 0.10-5.0 | 0.05 | 82.4  | 11.2 | 85.1  | 6.2 | 134  | ATQ-D8   |
| ATQ       | 0.999 | $y=0.747x$        | 0.10-5.0 | 0.02 | 106.5 | 5.6  | 114.2 | 6.6 | 98.8 | ATQ-D8   |
| Phe-9-Ald | 0.999 | $y=1.03x$         | 0.10-5.0 | 0.02 | 102.4 | 9.8  | 105.4 | 6.7 | 96.5 | ATQ-D8   |
| 11-BaFO   | 0.999 | $y=1.23x$         | 0.10-5.0 | 0.02 | 102.4 | 8.4  | 107.3 | 5.3 | 105  | ATQ-D8   |
| BZO       | 0.999 | $y=0.925x$        | 0.10-5.0 | 0.05 | 94.1  | 7.6  | 101.6 | 7.1 | 127  | ATQ-D8   |
| 7,12-BaAO | 0.995 | $y=0.277x$        | 0.10-5.0 | 0.05 | 91.7  | 10.6 | 105.7 | 7.9 | 132  | ATQ-D8   |
| NCQ       | 0.996 | $y=0.258x$        | 0.10-5.0 | 0.05 | 90.6  | 6.5  | 114.2 | 6.7 | 123  | ATQ-D8   |

---



**Table S3.** Basic characteristics of the volunteers in the study (N = 240).

| Characteristics                           | All participants | Males           | Females         |
|-------------------------------------------|------------------|-----------------|-----------------|
| No. of participants                       | 240              | 121             | 119             |
| Age, years (mean $\pm$ SD)                | 35.2 $\pm$ 22.6  | 36.0 $\pm$ 23.5 | 34.5 $\pm$ 22.2 |
| Age categories(years) (N, %)              |                  |                 |                 |
| Youths (<18 y)                            | 92 (38.33)       | 45 (37.19)      | 47 (39.50)      |
| Adults (18-59 y)                          | 100 (41.67)      | 51 (42.15)      | 49 (41.18)      |
| Elders ( $\geq$ 60 y)                     | 48 (20.00)       | 25 (20.66)      | 23 (19.33)      |
| BMI, kg/m <sup>2</sup> (mean $\pm$ SD)    | 21.4 $\pm$ 5.1   | 21.7 $\pm$ 5.5  | 21.1 $\pm$ 4.6  |
| BMI categories(kg/m <sup>2</sup> ) (N, %) |                  |                 |                 |
| Normal (<25)                              | 185 (77.08)      | 91 (75.21)      | 94 (78.99)      |
| Overweight(25 to 29.9)                    | 48 (20.00)       | 26 (21.49)      | 22 (18.49)      |
| Obese (>30)                               | 7 (2.92)         | 4 (3.31)        | 3 (2.52)        |

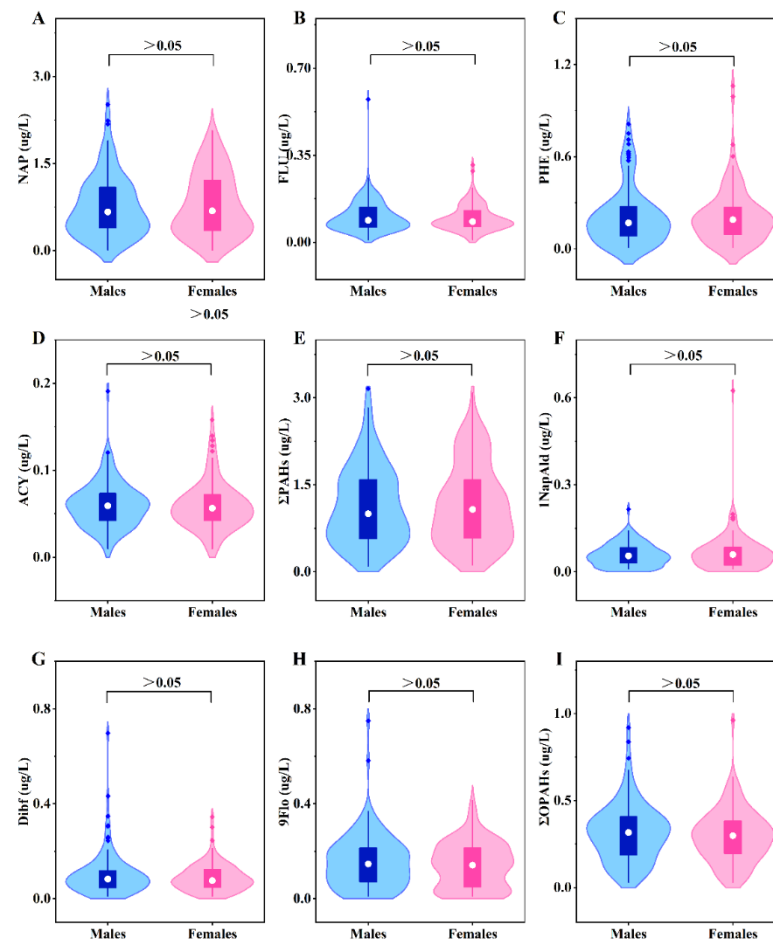

**Figure S4.** A box plot analysis of gender differences in the concentrations of selected OH-PAHs and PAHs.

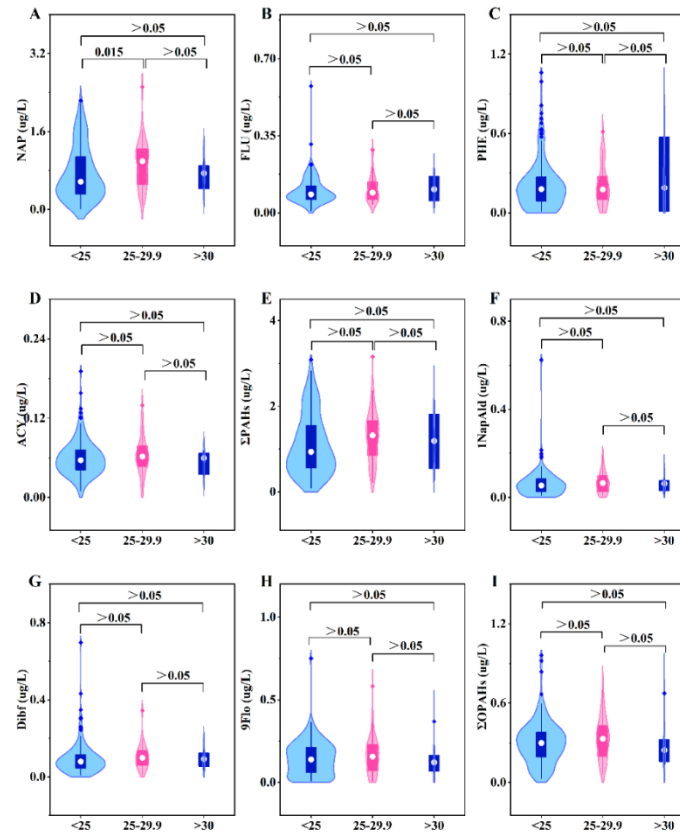

**Figure S5.** Body mass index differences in concentrations of the target PAHs and OPAHs: A box plot analysis.

**Table S4.** Comparison of concentrations of PAHs (Median/Mean, µg/L) form different countries and districts.

| Country                | Sampling year | Matrixes                     | NAP      | ACY      | ACP       | FLU      | PHE      | ANT      | FLT     | PYR     | BaA      | CHR      | BbF                 | BkF      | BaP      | IPY      | DBA      | BPE      | Ref       |
|------------------------|---------------|------------------------------|----------|----------|-----------|----------|----------|----------|---------|---------|----------|----------|---------------------|----------|----------|----------|----------|----------|-----------|
| Guangzhou, China       | 2022          | Serum                        | 0.771    | 0.0598   | /         | 0.101    | 0.21     | <LOD     | <LOD    | <LOD    | <LOD     | <LOD     | <LOD                | <LOD     | <LOD     | <LOD     | <LOD     | <LOD     | This work |
| Hongkong, China        | 2005          | Maternal serum               | 331ng/g  | 35ng/g   | 94ng/g    | 155ng/g  | 144ng/g  | 48ng/g   | 128ng/g | 154ng/g | 63ng/g   | 68ng/g   | 16ng/g <sup>a</sup> |          | <LOD     | <LOD     | <LOD     | <LOD     | 1         |
| United States          | 2010          | Plasma                       | 1.459    | 0.021    | 0.029     | 0.046    | 0.075    | 0.01     | 0.027   | 0.054   | 0.003    | 0.003    | 0.011               | 0.019    | 0.021    | 0.033    | 0.023    | 0.04     | 2         |
| Canada                 | 2003-2004     | Serum (smokers)              | 0.99     | —        | —         | —        | 5.45     | —        | —       | 0.3     | —        | 0.2      | —                   | 0.98     | —        | —        | —        | —        | 3         |
|                        |               | Serum (non-smokers)          | 0.44     | —        | —         | —        | 5.9      | —        | —       | 0.27    | —        | 0.4      | —                   | 0.22     | —        | —        | —        | —        |           |
| China                  | 2008          | Serum (Exposed group)        | 0.63     | 0.07     | 0.18      | 0.81     | 1.42     | 0.09     | 0.07    | 0.11    | 0.26     | 0.35     | 1.78 <sup>a</sup>   |          | 0.04     | 58       | 0.08     | 4.06     | 4         |
|                        |               | Serum (Reference group)      | 0.51     | 0.5      | 0.11      | 0.45     | 0.49     | 0.02     | 0.06    | 0.21    | 0.15     | 0.2      | 1.12 <sup>a</sup>   |          | 0.02     | 19.49    | 0.07     | 2.27     |           |
| Shengsi Islands, China | 2011-2012     | umbilical cord serum         | 31.6ng/g | 1.46ng/g | 0.297ng/g | 2.53ng/g | 8.13ng/g | 6.12ng/g | 14ng/g  | 98ng/g  | 7.21ng/g | 9.49ng/g | 6.05ng/g            | 2.12ng/g | 10.6ng/g | 6.16ng/g | 4.39ng/g | 28.9ng/g | 5         |
| Spain                  | 2007-2009     | Serum (Bladder cancer cases) | 0        | <LOD     | <LOD      | <LOD     | 0.5      | 0        | <LOD    | 0       | 0        | 0        | <LOD                | <LOD     | <LOD     | <LOD     | <LOD     | <LOD     | 6         |
|                        |               | Serum ( Controls)            | 0        | 0        | 0         | <LOD     | 0.9      | 0        | <LOD    | 0       | 0        | 0        | <LOD                | <LOD     | 0        | <LOD     | <LOD     | <LOD     |           |
| Greece                 | 2017          | Serum (Leukemia cases)       | 11.1     | 0.39     | 19.1      | 23.8     | 62.2     | 2.95     | 9.92    | 5.03    | 3.28     | 0.001    | 5.48 <sup>a</sup>   |          | 3.49     | 1.13     | 2.85     | 1.95     | 7         |
|                        |               | Serum (Controls)             | 9.55     | 0.39     | 18.3      | 18.8     | 48.6     | 2.82     | 6.42    | 3.97    | 2.9      | 0.001    | 5 <sup>a</sup>      |          | 3.29     | 1.47     | 1.26     | 1.95     |           |
| Beijing, China         | 2017          | serum                        | —        | 1.82     | —         | —        | 2.43     | —        | 3.09    | 8.48    | —        | —        | —                   | —        | 0.07     | —        | —        | —        | 8         |
| Poland                 | 2014          | maternal blood               | 57.5     | 2.1      | 1.7       | 3.9      | 71       | 79       | 34      | 26.5    | 4.7      | 7.5      | 2.2                 | 1.2      | 0.75     | 1.65     | 1.85     | 2.2      | 9         |
|                        |               | cord blood                   | 45.5     | 1.45     | 0.9       | 6.25     | 37.95    | 58.1     | 50.5    | 33      | 16.25    | 5.05     | 2.3                 | 2.45     | 1.6      | 4.7      | 5.15     | 5.05     |           |
| Shanxi, China          | 2010-2013     | NTDs serum                   | —        | 236ng/g  | 303ng/g   | 814ng/g  | 1820ng/g | 142ng/g  | 345ng/g | 441ng/g | 137ng/g  | 188ng/g  | 103ng/g             | 32.2ng/g | 54.7ng/g | /        | /        | /        | 10        |
|                        |               | Controls                     | —        | 93.8ng/g | 99.1ng/g  | 412ng/g  | 796ng/g  | 54.4ng/g | 134ng/g | 186ng/g | 56.9ng/g | 65.3ng/g | 46.5ng/g            | 11.3ng/g | 21.4ng/g | /        | /        | /        |           |

"/" Not listed in the paper, "—" Not studied, "a" The sum of BbF and BkF

## Reference

- [1] Tsang HL, Wu S, Leung CK, Tao S, Wong MH (2011) Body burden of POPs of Hong Kong residents, based on human milk, maternal and cord serum, *Environment International* 37:142–151. [doi:10.1016/j.envint.2010.08.010](https://doi.org/10.1016/j.envint.2010.08.010).
- [2] Pleil JD, Stiegel MA, Sobus JR, Tabucchi S, Ghio AJ, Madden MC (2010) Cumulative exposure assessment for trace-level polycyclic aromatic hydrocarbons (PAHs) using human blood and plasma analysis, *J Chromatogr B* 878:1753-1760. [doi:10.1016/j.jchromb.2010.04.035](https://doi.org/10.1016/j.jchromb.2010.04.035).
- [3] Neal MS, Zhu J, Foster WG (2008) Quantification of benzo[a]pyrene and other PAHs in the serum and follicular fluid of smokers versus non-smokers, *Reproductive Toxicology* 25:100–106. [doi:10.1016/j.reprotox.2007.10.012](https://doi.org/10.1016/j.reprotox.2007.10.012).
- [4] Xu X, Liu J, Huang C, Lu F, Chiung YM, Huo X (2015) Association of polycyclic aromatic hydrocarbons (PAHs) and lead co-exposure with child physical growth and development in an e-waste recycling town, *Chemosphere* 139:295-302. [doi: 10.1016/j.chemosphere.2015.05.080](https://doi.org/10.1016/j.chemosphere.2015.05.080).
- [5] Yin S, Tang M, Chen F, Li T, Liu W (2017) Environmental exposure to polycyclic aromatic hydrocarbons (PAHs) The correlation with and impact on reproductive hormones in umbilical cord serum, *Environmental Pollution* 220:1429e1437. [doi.org/10.1016/j.envpol.2016.10.090](https://doi.org/10.1016/j.envpol.2016.10.090)
- [6] Boada LD, Henríquez-Hernández LA, Navarro P, Zumbado M, Almeida-González M, Camacho M, Álvarez-León EE, Valencia-Santana JA, Luzardo OP (2015) Exposure to polycyclic aromatic hydrocarbons (PAHs) and bladder cancer: evaluation from a gene-environment perspective in a hospital-based case-control study in the Canary Islands (Spain), *Int J Occup Environ Health* 21:23-30. [doi: 10.1179/2049396714Y.0000000085](https://doi.org/10.1179/2049396714Y.0000000085).
- [7] Koukoulakis KG, Kanellopoulos PG, Chrysochou E, Koukoulas V, Minaidis M, Maropoulos G, Nikoleli GP, Bakeas E (2020) Leukemia and PAHs levels in human blood serum: Preliminary results from an adult cohort in Greece, *Atmospheric Pollution Research* 11:1552-1565. [doi:10.1016/j.apr.2020.06.018](https://doi.org/10.1016/j.apr.2020.06.018).
- [8] Han M, Ma A, Dong Z, Yin J, Shao B (2023) Organochlorine pesticides and polycyclic aromatic hydrocarbons in serum of Beijing population: Exposure and health risk assessment, *Sci Total Environ* 860:160358. [doi:10.1016/j.scitotenv.2022.160358](https://doi.org/10.1016/j.scitotenv.2022.160358).
- [9] Zajdaa K Anna Ptaka , Raka A, Fiedor E, Grochowalski A, Milewicz T , Gregoraszczyka EL (2017) Effects of human blood levels of two PAH mixtures on the AHR signaling, *Toxicology* 389 :1–12. [doi.org/10.1016/j.tox.2017.07.003](https://doi.org/10.1016/j.tox.2017.07.003).

[10] Wang B, Jin L, Ren A, Yuan Y, Liu J, Li Z, Zhang L, Yi D, Wang L, Zhang Y, Wang X, Tao S, Finnell RH (2015) Levels of Polycyclic Aromatic Hydrocarbons in Maternal Serum and Risk of Neural Tube Defects in Offspring. *Environ. Sci. Technol.* 2015, 49, 588–596. [DOI: 10.1021/es503990v](https://doi.org/10.1021/es503990v).
